# Supplementary material for: Consumer Valuation of and Attitudes Towards Novel Foods Produced with NPETs: A Review
Source: Preprints.org preprint supplement (doi:10.20944/preprints202108.0508.v1), 2021-08-26
Supplement: Supplementary file 1 [file detail description of articles reviewed in Beghin-Gustafson Sustainability.xlsx]

## Sheet: final studies selection
study number	year	study authors and date	Full reference	topic	commodity/food item	what is estimated	wtp	attitude acceptance	comparative	trait(s)	method	sample size (kept)	estimated values	GMO	GE gene / genome editing crispr talen	NPETs/NBTs (a a group), rnai, cisgenic	conventional/ hybrids	organic	country	population sampled	remarks	heterogeneity
1	2019	An, Lloyd-Smith and Adamowicz (2019)	An, Henry, Wiktor L. Adamowicz, and Patrick Lloyd-Smith. "Strategic behavior in stated preferences and the demand for gene-edited canola oil." mimeo (2019).	WTP for GE canola oil wrt to GMO canola oil and addressing hypothetical bias and strategic behavior of respondents	canola oil	WTP for GE canola oil wrt to GMO canola oil	x		x	low saturated oil content, country of origin. Canadian canola is either or both insecticide/herbicide resistant	stated preferences with choice experiment. use software NGENE to generate a d-optimal efficient design (zero priors) with 4 blocks and 4 choice sets in each block for canola oil. RUM approach conditional logit	internet sample. 200 pre test 1500 respondents	cad $1.20 to $2.14 more per litre for GE canola oil, a premium of 27-47% over average canola oil prices in Canada The marginal WTP for canola oil with half the saturated fat ranges from $1.04 to $1.50 CAD per liter. the price for a litre of canola oil in Canada can range from $1.50 CAD (no name bulk size) to over $10 CAD (organic) with an average price of approximately $4-5 CAD	x	x	na	na	na	Canada		trying to correct for hypothetical bias by random assignment to price, provision effects, no effects.
2	2019	Arias-Salazar. Madrigal-Pana, Valdez_Melara, and Gatica-Arias (2019)	Salazar, Alejandra Arias, Johnny Madrigal Pana, Marta Valdez Melara, and Andrés Gatica Arias. "Attitudes towards genome editing among university students in Costa Rica." Revista de Ciencia y Tecnología 35, no. 2 (2019).	perceptions and knowledge of Costa Rican students on benefits and risk of GE-CRISPR9 wrt application in nature conservation, animal diseases, humans and crop improvements	food, crops, rice, beans	Wt consume and buy if better, cheaper, ag products, rice, beans with Y,N, Not sure		x		no particular trait, just "better" for natural conservation, human health, or cheaper	multivariate regression on a dependent attitudinal scalle variable	1144 university students from various fields stem and humanities	no explict value but 37.1% would buy rice and beans if the price was equal to conventional, 46.5% willing to buy general ag products if same price as conventional. WTB decreases with age	na	x	na	na	na	Costa Rica	University students sample	how to use these results. Presumably, there is some consumer mass willing to pay a bit more than the price of conventional is that large fraction are willing at the pivotal conventional price	x
3	2019	Britton and Tonsor (2019)	Britton, Logan L., and Glynn T. Tonsor. "Consumers’ willingness to pay for beef products derived from RNA interference technology." Food Quality and Preference 75 (2019): 187-197	wtp for RNAi beef	beef	Wtp for beef that is RNAi	x			RNAi and antibiotic free/not free and different meat grades	choice experiment (4 design) then RUM with WTP from as logit estimation Multinomial logit (MNL) and random parameters logit (RPL) models	3000 online surveys	discount for rnai beef of about -3 to -5% (betarnai/beta price)	na	na	RNAi	na	na	usa	online survey	important framing effects with messages and variation with multiple attributes (RNAi, antibiotic, beeef quality). Age, female affects Wtpurchase and eat negatively, education positively	x
4	2020	Britton and Tonsor (2020)	Britton, Logan L., and Glynn T. Tonsor. "US consumers' attitudes toward RNA interference technology in the beef sector." Journal of Agriculture and Food Research 2 (2020): 100049.	us consumers perception and attitudes wrt RNAi in beef products, willingness to eat (WTEat)	beef	Wteat beef that is RNAi		x		RNAi for animal health, , cattle protection against disease,	generalized ordered logit	2999 online surveys	NA for wtp. 25.2% w teat, 32.2% wt purchase 25.1% view rnai beef as safe for human health, 22% safe for their family, 63.6% think side effects of eating RNAi meat are unknown 45.%% think family could be exposed to great risk	na	na	RNAi	na	na	usa	online survey		x
5	2021	Borrello, Cembalo, and Vecchio (2021)	Borrello, M., Cembalo, L. and Vecchio, R., 2021. Role of information in consumers’ preferences for eco-sustainable genetic improvements in plant breeding. Plos one, 16(7), p.e0255130.	WTP for wine made with FRG grapes	wine	WTP for FRG based wine	x	x	x	FRG grapes used for wine, reduced environmental impact and toxicity impact, profit for producers treatment with different messages	survey monkey online with wine drinkers rabdom assignment to information treatments (control, positive, negative) , ordered price choices 1 to 16 euros plus collection of socio demographics, then SUR linear regression of deltaWTP on characteristics and treatments	627 online wine drinkers	premium price for horticultural FRG wines compared to conventional wines (+9.14%) and a strong discount for genome edited FRG wines (–21.13%). The results also reveal that negative information reduces consumers’ WTP for horticultural FRG wines, while positive information increases their WTP for genome edited FRG wines. Heterogenous counsumers with some with higher wtp for FRG wines WTP for gen ed…		x	na	x		Italy	online non representative adults with higher proportion of education and females	Genome editing is called GMO in the message to control group.? Heterogeneity on wine subjective knowledge, neophobia of technology and attitude towards sustanability. SUR does not help for some censoring or corner although the delta may help	x
6	2021	Busch Ryan Von Keyserlingk & Weary (2021)	Busch, G., Ryan, E., Von Keyserlingk, M. A., & Weary, D. M. (2021). Citizen views on genome editing: effects of species and purpose. Agriculture and Human Values, 1-14.	consumer perception of genome editing by species (plant, animal, human) across 5 countries	wheat, humans, milk, beef, pork	attitude for or against		x		resistance for wheat mildew, HIV human, milk allergy, muscle growth cattle, PRRSV in pig (porcine reproductive and respiratory syndrome)	online surveys in 5 countries (Canada, Austria, USA, Germany, Italy). Scale wrong to right likert scale 1-7. and evaluation of perceived risk and benefits. Factor and cluster analysis	3698	heterogenous attitudes toward the 5 GE applications, with most favorable in USA and Italy. Leat favorable application for muscle in beef and milk allergy. HIV highly accepted.	na	x	na	na	na	Canada, Austria, USA, Germany, Italy	online representative surveys	the heterogeneity theme goes well with the Marette et al. papers 1 and 2 which show that a significant segments of conusmers accept GE for all kinds of application. Religion matters, sense of right/wrong, risk perceptions, benefit perception, and tampering with nature perceptions	x
7	2020	Caputo, Lusk, and Kilders (2020)	Caputo, V., J. Lusk, and V. Kilders. "Consumer Acceptance of Gene Edited Foods: A nationwide survey on US consumer beliefs, knowledge, understanding, and willingness to pay for gene-edited foods under different treatments." FMI Foundation report (2020).	survey of us consumers on beliefs, knowledge, understanding and WTP for GE foods pork chop, bacon, tomatos, pasta sauce, spinash fresh, frozen	pork, tomato, spinash	WTPs WTP for these goods and their conditioning by information on benefits, and awarness and knowledge about GE (and GMO)	x	x	x	price, taste, organic, production method, safe, healthy (vitamins, antioxicandts, potassium) , beneficial to animal welfare (disease resitance) and environment (water saving)	hypothetical discrete choice experiment online questionnaires on attitudes (ethics) etc and WTP between conventional, organic, GMO and GE goods, treatements 3 types of goods (meat, green vegetable, tomatos), 5 production methods (C, O, Gnon-GMO, MO, GE), info on GE, price levels. Cluster analysis with 3 segments of risk perception and impact of treatment, outside option use mixed logit model base…	4487 food shoppers online	mean WTP for organic>conventional>GE>GMO. Need info on tangible benefit of GE more than just the technology. Low awareness and knowledge of GE but high awarness of GMO, benefits to consumers or the environment stronger WTP, not for benefits to farmers. WTP varies by product and processing (fresh has higher wtp for spinash and tomatoes than processed also more than fresh pork. Bacon has higher WTP…	x	x	na	x	x	USA	18yo or older US shoppers, representative sampling by Dynata, except gender income and education (typical departures)	also non-GMO label, heterogeneous consumers, some willing to pay for GE goods and information matters. This is the only paper with WETP for GMO higher than GE except for benefit to consumer for tomotos and a spinash for benefit to the environment (WTP doubles), but GE is big unknown. information on technology does not help but information on benefits does increase acceptance and WTP. Benefits to …	x
8	2011	Colson and Huffman (2011)	Colson, Gregory, and Wallace E. Huffman. "Consumers' willingness to pay for genetically modified foods with product-enhancing nutritional attributes." American Journal of Agricultural Economics 93, no. 2 (2011): 358-363.	WTP for vitamin and antioxydant fortified food (all combined) transgenic and intragenic with control of informaton	vegetables	wtp for fortified food with technology and information treatment	x		x	labels on goods fortification and production process (no info, GM free, gm, intragenic)	nth price auction mechanism to reveal WTP plus bayesian economtrics to account for censoring of bids, commodity fixed effects, bidding-round fixed effects and unobserved correlation across rounds. Fixed payment to all participants, plus 3 information treatments (pro/anti gmo, verifiable-3d party).	191 participants	in %: All treatments 25 (intragenic fortified-conv without) 5 (transgenic enhanced-plain conventional) No information 31 26 Pro-biotech only 63 19 Anti-biotech only −12 −18 Pro- and anti-biotech 19 3 Pro- and anti-biotech and verifiable 18 −8	x	na	intragenic	x	na	USA	3 urban centers in US, randomly chosen phone call to recruit by independent survey agency	interesting table 2 showing that a large segment (48-50%)prefer intragenic enhanced over plain label, for most information treatment except just anti biotech	x
9	2011	Colson, Huffman, and Rousu (2011)	Colson, Gregory J., Wallace E. Huffman, and Matthew C. Rousu. "Improving the nutrient content of food through genetic modification: Evidence from experimental auctions on consumer acceptance." Journal of Agricultural and Resource Economics (2011): 343-364.	WTP for vitamin and anti-oxydant fortified food (tomatoes, broccoli and potatoes) transgenic and intragenic with control of informaton	tomato, broccoli, potato	WTP for these fortified food (anti-oxydant and vitamins)	x		x	labels on goods fortification and production process (no info, GM free, gm, intragenic)	nth price auction mechanism to reveal WTP plus bayesian economtrics to account for censoring of bids, commodity fixed effects, bidding-round fixed effects and unobserved correlation across rounds. Fixed payment to all participants, plus 3 information treatments (pro/anti gmo, verifiable-3d party).	190 participants	significant premium for intragenic fortified against plain w/o=1.22 (broccoli), 1.15$ (tomato), 1.16 (potato) with pro biotech message. No infor just potato (1.21) signifcant. Signifcant transgenic fortifed against conventionalw/o= 0.49 for broccoli with pro biotec message. in intragenic, fortified valued 1.17 (potato) no message, 0.78 (broccoli), 1.02 tomato, 0.95 potato with pro biotech message…	x	na	intragenic	x	na	USA	2 urban centers in US, randomly chosen phone call to recruit by independent survey agency	formalized experiments and long description in the paper. Some bayesian estimation to capture censoring of zero bids. Crowding with 3 types of messagses reduces wtp for the enhanced food
10	2020	De Marchi, Cavaliere, and Banterle (2020a)	De Marchi, E., A. Cavaliere, and A. Banterle (2020). “Consumers’ Choice Behavior for Cisgenic Food: Exploring the Role of Time Preferences.” Applied Economic Perspectives and Policy, doi:10.1002/aepp.13043.	time preference and socio-economics of preference for cisgenic v. conventional apples	apples	treatments:market price,production technology conventional or cisgenic brand, “no brand” or “Melinda” COO, Italy, Germany, and China		x	x	cisgenic vesus conventional and interaction with time preferemce and socio demographics	choice experiment face to face interviews (same survey I believe than the 1st paper) questionnaire with Consideration of Future Consequences fourteen-item scale 7Q for immediate and 7 for future-oriented	570 adults	disutility impact of technology is signifcant (ly negative) for all models (around -1.10 to -1.29) as large as price disutility (cisgenic relative to conventional) . Education decreases the disutility by 0.29. low time preference increases disutility; youth too. Income increases discount not sure of units	na	x	na	x	na	Italy	18 yo and older. Nothing is said on sampling	this is the same data as the previous study so not really an independent estimate. The authors make a difference between GE and cisgenesis -we may have to plit the two	x
11	2020	De Marchi, Cavaliere, and Banterle (2020b)	De Marchi, Elisa, Alessia Cavaliere, and Alessandro Banterle. "Identifying Motivations for Acceptance of Cisgenic Food: Results from a Randomized Controlled Choice Experiment." Journal of Agricultural and Resource Economics Preprints (2020).	the role of health and environmental benefits with cisgenic apples 4 treatments (basic information treatments, naturalness treatment, health, and environment treatments)	apples			x	x		hypothetical choice experiment with face to face surveys RUM model with error component	826 adults	discount for technology is from -3.669 (model 1) to -3.328 (1+naturalness, -0.995 (1+health), -.456 (1+environment) message. No buy discount is above health and environment so there is a market. Not sure of the units (euros?)	na	na	cisgenic	x	na	Italy	18 yo and older in Milan random sampling	different sample as the other 2 studies, no analysis of socio demographics, desirability bias potential mentioned with gface to face, no check on prior information, price choices limited
12	2019	De Marchi, Cavaliere, Bacenetti, Milani, Pigliafreddo, and Banterle (2019)	De Marchi, E., A. Cavaliere, J. Bacenetti, F. Milani, S. Pigliafreddo, and A. Banterle (2019). “Can consumer food choices contribute to reduce environmental impact? The case of cisgenic apples”. Science of The Total Environment, 681: 155-162.	consumer acceptance of cisgenic apples with environmental benefit (reduced pesticide use)	apples	wt buy relative to conventional	x		x	reduced pesticide in cisgenic apples & "attribute non-attendance behaviors (ignorance of some attribute)	hypothetical discrete choice experiment with conventional alternative plus identification of heuristics "attribute non attendnace" face to face interviews variation on brand, production, price and coo plus bayesian design	582	3 heuristics identified with different behaviors. Conventional product is preferred by choice or by ignorance (set to zero 54% of the sample)). Technology driven sub group has a small discount than the "attentive group" -0.464 versus -5.807 (table 2)	na	na	cisgenic	x	na	Italy	random sample	interesting on the attribute non attendance/heuristics used by consumers	x
13	2016	De Steur et al. (2016)	De Steur, H., Blancquaert, D., Strobbe, S., Feng, S., Buysse, J., Stove, C., Lambert, W., Van Der Straeten, D. and Gellynck, X., 2016. Consumer acceptance and willingness-to-pay for genetically modified foods with enhanced vitamin levels. Genetically Modified Organisms in Food: Production, Safety, Regulation and Public Health; Elsevier Academic Press: Amsterdam, Netherlands, pp.195-206.	Consumer acceptance and WTP for transgenic and cisgenic food with enhanced vitamin levels	tomato, broccoli, potato, vegetables	wtp and acceptance of fortified food via biotech	x	x	x	bio-fortified with vitamins	meta analysis/ systematic review. Colson's work is the only intragenic reviewed	19 studies	review premia for bio-fortified food. See review of Colson et al 2011 jare paper for the WTP value	x	na	intragenic	x	na	USA, China, France, NZ,	varies by study	This study does not add anything to Colson's papers. There is strong evidence reviewed here than enhanced food are accepted by consumers and WTP is positive for GMO bio-fortified food items across many countries
14	2015	Delwaide et al. (2015)	Delwaide, Anne-Cécile, Lawton L. Nalley, Bruce L. Dixon, Diana M. Danforth, Rodolfo M. Nayga Jr, Ellen J. Van Loo, and Wim Verbeke. 2015. "Revisiting GMOs: are there differences in European consumers’ acceptance and valuation for cisgenically vs transgenically bred rice?." PloS one 10, no. 5 (2015): e0126060.	EU consumer acceptance of rice GMO, and cisgenic and rice with enviro. Benefits	rice	wtp and acceptance of cisgenic and gmo rice	x	x	x	cisgenic versus gmop, versus coventional with environmental benefits	online survey with multiple price list and censored regression with 15 treatments. Differential of WTPs (pairwise) to estimate discount/premia for some types	3002	negative premium for GMO in 5 countries, discount is smaller for cisgenic except in Spain. Very large wt to avoid GMO. Small proportion of consumers wiulling to consume cisgenic or GMO, the worst in France	x	na	cisgenic	x		EU countries: Belgium, France, The Netherlands, Spain, The UK.	Survey Sampling International (SSI) representative samples	parallels Lusk older meta-analysis work on France with the steeper discount and highest willingness to avoid GMO. French consumers are wtp for environmental benefits	x
15	2018	Edenbrandt (2018)	Edenbrandt, Anna Kristina. 2018. "Demand for pesticide-free, cisgenic food? Exploring differences between consumers of organic and conventional food." British Food Journal (2018).	WTP for cisgenic food that are pesticide free relative to conventional food and consumer segments	rye bread	wtp for bread under price, technology, and packaging treatments	x		x	pesticide free or not, cisgenic, transgenic or conventional, price, domestic/imported, loaf/sliced	revealed preference on organic purchase plus choice experiments. 3 segments (green potentially greens, nongreens) with RUM on price and characteristics	781 adult respondents	(comparison or trait), model 1 model 2 3 segments Transgenics over conventional −17.27*** −10.96***−16.47***−28.69*** Cisgenics over conventionalᵇ -7.69*** −4.97 −4.53 −31.74*** Transgenics over cisgenicsᶜ −9.58*** −5.99 −11.93*** 3.05 Pesticide-freed 0.22 −4.13* 3.39 −7.11 Pesticide-free by cisgenic methodsᵉ 5.97** 1.72 3.43 29.21*** Transgenicsandpesticide-free over conventionalᶠ −17.05*** -15.…	x	na	cisgenic	x	x	Denmark	consumer panelsby GfK ConsumerScan Denmark	segmented consumers based on organic milk because organic rye is small share. Got rid of extensive margin (no purchase). Transgenic strongly disliked more than cisgenic. Heterogeneity formalized by signifcant variance. Price response is small. Looks at labeling or not and market share. no cost of information. pesticide free less valued than organic.	x
16	2018	Edenbrandt, Gamborg, and Thorsen (2018)	Edenbrandt, A. K., C. Gamborg, and B. J. Thorsen (2018). “Consumers’ Preferences for Bread: Transgenic, Cisgenic, Organic or Pesticide-free?”Journal of Agricultural Economics 69(1): 121-141.	WTP for cisgenic food that are pesticide free relative to conventional food and consumer segments	rye bread	wtp for bread under price, technology, and packaging treatments	x		x	pesticide free or not, cisgenic, transgenic or conventional, price, domestic/imported, loaf/sliced	revealed preference on rye bred purchase plus choice experiments, both with RUM on price and characteristics	713	RUM results show lower disutulity for cisgenic (-0.84) than transgenic (-1.80) but both larger than do not buy (-0.76). Large std deviation suggests hetergeneity of consumers. Pesticide free transgenic reduces the discount by 0.5 and makes it attractive (better than do not buy)	x	na	cisgenic	x	x	Denmark	consumer panels by GfK ConsumerScan Denmark to match revealed and stated preferences	close to the Edenbrdant paper in British Food Journal	x
17	2018	Edenbrandt, House, Gao, Olmstead, and Gray. 2018.	Edenbrandt, Anna Kristina, Lisa A. House, Zhifeng Gao, Mercy Olmstead, and Dennis Gray. 2018. "Consumer acceptance of cisgenic food and the impact of information and status quo." Food Quality and Preference 69 (2018): 44-52	wtp for cisgenic food (grapes)	grapes	wtp for grapes and with variation in seed attributes and 2 traditional grapes (muscadine, Thompson-table grape) and interaction	x		x	production process, seed(less) (small, large, none)	stated preferences choice experiment with 3 prices, 3 production process, 3 seeds, 2 grapes, short, long message, then linear utility (RUM to me) and multinomial and random parameter logit. Base level grape has large seeds and bred conventional	854 muscadine, 900 table grapes	key results WTP is smallest for transgenic, then cisgenic, then conventonal but all higher than opt out. WTP base (1.99 and 2.02 for table, 2.52 and 2.61 for muscadine. discounts transgenic=-0.72, -0.51 table, -0.84 and -0.64 muscadine; discount cisgenic= -.23 and -.22 for table, -.84 and -.64 for muscadine), seed-production method interaction not large. seedless is largest booster of WTP	x	na	cisgenic	x	na	USA	online survey, southern US region	typical over-representaton of female in sample and overly white for the south. Potential conclusion that adding an improvement is key (seedless here), see also Marette, and Colson et al. on vegetables. Also issue of status quo || to collapse (loss of an option brought back by GM or npets seens as a positive. collapse is the extreme case of losing all attributes.
18	2010	European Food Safety Authority (EFSA) (2010)	European Food Safety Authority (EFSA). 2010. SPECIAL EUROBAROMETER 354. Food-related risks, 2010.	large EU survey to gather risk perception of consumers includingh GMO. Will use this wrt the 2019 EFSA publication	food, drink	risk concerns		x	x	GMO/genetically modified organisms	simple survey question and ANOVA	26691 interviews	survey of perceived food sagety risk on GMO in 2005 and 2010, ( then in 2019 GE). In 2005 62% were concerned by GMO and then 66% on 2010 for EU27.	x	na	na	x	na	EU-27	representative sample in 27 members	use these 2 surveys to conjecture that GE concerns are low relative to GMO and that GMO followed an inverted U shape for it sconcern which have decrease considerably since 2008.	x
19	2019	European Food Safety Authority (EFSA) (2019)	European Food Safety Authority (EFSA). 2019. SPECIAL EUROBAROMETER Wave EB91.3. Food Safety in the EU. 2019.	similar idea as in 2010 and 2005	food, drink	risk concerns		x	x	GMO and GE	simple survey question and ANOVA	27655	28% concerned by GMOs, 4% concerned by Genome editing	x	x	na	x	na	EU-27	representative samples in 28 EU members		x
20	2020	Farid, Cao, Lim, Arato, and Kodama (2020)	Farid, Mohamed, Jianfei Cao, Yeongjoo Lim, Teruyo Arato, and Kota Kodama. 2020 "Exploring factors affecting the acceptance of genetically edited food among youth in Japan." International journal of environmental research and public health 17, no. 8 (2020): 2935.	Acceptance of gene edited food and conditioning factors	food, crops	Knowledge, Attitude Towards Technology, Perceived Benefits, Perceived Risks, Trust, and Willingness to Purchase, and role of information on these (2 surveys)	x	x		focus on technology and its risks and benefits (human health, animal health and comfort, effect on the local economy and agriculture, and solving hunger)	double survey plus intervention in between to measure impact of science commuication with structural equation modeling and estimation on adoption rate	180	estimates of impacts of factors caturing KN, ATT, PR,PB, TR eventually on WTP. Perceived benefit has a coefficient of 0.437 on WTP and risk -0.194. Not sure how to read these. ATT affects knowledge and trust eventually to WTP, 24% (surbey 1) and 41% (survey 2) of respondents willing to buy GE food.	na	x	na	na	na	Japan	University students online surveys	unsual path model estimation (no equation to see how it is done. Almost looks like partial correlations between factors and attitide ratings and WTP. Communication matters here (in between the 2 surveys)	x
21	2020	Ferrari, Baum, Banterle, and De Steur (2020)	Ferrari, Linda, Chad M. Baum, Alessandro Banterle, and Hans De Steur. (2020). "Attitude and labelling preferences towards gene-edited food: a consumer study amongst millennials and Generation Z." British Food Journal (2020).	consumer attitudes for GE food and labelling and influences of educational background, bjective/subjective knowledge, environmental concern and socio-demographics	food	attitude for or against GE and labeling preference		x	x	GE generic then environmental concerns, objective knowledge on GE.	2 online survey samples of millenials and Gen Z in Belgium and NL, then OLS and ordered logit models; differentiates objective and subjective knowledge, risk perception, factoe analysis to reduce the dimensionality of many questions per category (risk, knowledge, sociodemographics)	234	findings more than estimates: knowledge on GE and GMO was good (4.9/6), ok, on GMO policy Belgians more knowledgeabl ethan Dutch, attitudes on risk and pro/against GE and GMO are near the middle in likert scale. GE and GMO should be labelled but limited support for same label. Positive towards GE explained by objective knowledge and negatively by env. concerns. attitude to GE explains GE labels (…	x	x	na	na	na	Belgium, Netherlands	Generation Z and millenials	a lot of comparison to GMO in the text and guiding the specification of conditioning factor (risk, knowledge).	x
22	2011	Gaskell et al. (2011)	Gaskell, George, Agnes Allansdottir, Nick Allum, Paula Castro, Yilmaz Esmer, Claude Fischler, Jonathan Jackson et al. "The 2010 Eurobarometer on the life sciences." Nature biotechnology 29, no. 2 (2011): 113-114.	see eurobarometer 2010	food			x	x		none just descriptive	efsa eurobarometer data 13,529	Eurobarometer points to some of the general criteria—sustainability, benefits, appropriate regulation, safety and a fair distribution of benefits and risks. This is complementary to the article by Kronberger et al. on eurobarometer on cisgenesis being more acceptable than GMO	x	na	cisgenic	x	na	EU-27			x
23	2019	Gatica-Arias, Valdez-Melara, Arrieta-Espinoza, Albertazzi-Castro, and Madrigal-Pana. (2019)	Gatica-Arias, Andrés, Marta Valdez-Melara, Griselda Arrieta-Espinoza, Federico J. Albertazzi-Castro, and Johnny Madrigal-Pana. "Consumer attitudes toward food crops developed by CRISPR/Cas9 in Costa Rica." Plant Cell, Tissue and Organ Culture (PCTOC) 139, no. 2 (2019): 417-427.	perceptions and knowledge of Costa Ricans on benefits and risk of GE-CRISPR9 wrt application in nature conservation, animal diseases, humans and crop improvements	food, crops, rice, beans	Wt consume and buy if better, cheaper, ag products, rice, beans with Y,N, Not sure and attitude scale		x		no particular trait, just "better" for natural conservation, human health, or cheaper	multivariate regression on a dependent attitudinal scalle variable	1018 adult Costa-Rican phone interviews	no explict value but 50% would buy rice and beans if the price was equal to conventional	na	x	na	na	na	Costa Rica	general population phone sample		x
24	2016	Ishii and Araki (2016)	Ishii, T., & Araki, M. (2016). Consumer acceptance of food crops developed by genome editing. Plant cell reports, 35(7), 1507-1518.	constraints on consumer acceptance of ge food	food	NA review article		x		improved nutrition value, higher yields, pest and disease resistance and increased tolerance to environmental changes	review of issues with ethics, risk assessment etc	na	NA	na	na	na	na	na	na		not useful for us, except some pointers for issues (risk assessment, social acceptability, ethics and labeling)
25	2021	Kato-Nitta, Inagaki, Maeda, and Tachikawa (2021)	Kato-Nitta, Naoko, Yusuke Inagaki, Tadahiko Maeda, and Masashi Tachikawa. 2021. "Effects of information on consumer attitudes towards gene-edited foods: a comparison between livestock and vegetables." CABI Agriculture and Bioscience 2, no.1 (2021): 1-12.	attitudes and information provision on GE livestock (pig) and vegetables (tomatoes) in Japan using a web survey. Major concern is the concern to change appearance of animals	tomato, pork	acceptability of these two products and how information influence the acceptability/attitudes		x		increasing size; more resistant to disease; better nutritional value and taste	multivariate analysis on data collected in online surveys with hypotheses plants and animals are different, scientific knowledge influences preferences	4514 (2288 amimal and 2226 tomatos	GE vegetable more acceptable/benefitial than GE pig/meat for most attributes. Science literacy influences the acceptability of GE vegetable positively for all attributes and animal for disease resitance	x	x	na	x	na	Japan	Japanese adults 20-69 yo, done by a survey company, follows 2015 census regional weights, pretty representative	The conventional and GMO comparison was only used in the informaton provision, not in the value elicitation. same authors have a 2d paper on another commodity	x
26	2019	Kato-Nitta, Maeda, Inagaki, and Tachikawa. (2019)	Kato-Nitta, Naoko, Tadahiko Maeda, Yusuke Inagaki, and Masashi Tachikawa. 2019. "Expert and public perceptions of gene-edited crops: attitude changes in relation to scientific knowledge." Palgrave Communications 5, no. 1 (2019): 1-14.	expert and public attitudes toward gene editing to agricultural crops compared GMO and conventional breeding in 3 groups molecular biology experts, experts in other fields, and lay public. Also use and test of information deficit model (for lay consumers)	crops	acceptability of GE relative to GMO and conventional looking at risk , benfit and value perceptions of consumers split into 3 groups		x	x	risk, benefit, and value perceptions	2 online surveys and multivariate analysis with expert, lay public and before and after information provided on biotech	3197	Mol bio experts with higher benefit and value perceptions, and lower risk perceptions of biotechnologies but GMO ranked slightly better than GE for several benefits; lay public views GE better than GMO, but much lower than conventional. Experts of other fields, in between. Science literacy increased nefit perception in lay people. women discount benefits of biotech. science literacy increase bene…	x	x	na	x	na	Japan	adult population sampled by a survey company. Quasi representative sample for large sample (3000), then not representative for experts (2 groups 111 molecular bio, 86 other fields)	graphs are most telling. very low adjusted R^2, results on science literacy more muddled than explained (sign reversals, not all significant)	x
27	2021	Kilders and Caputo (2021)	Kilders, Valerie, and Vincenzina Caputo. 2021. "Is Animal Welfare Promoting Hornless Cattle? Assessing Consumer’s Valuation for Milk from Gene‐edited Cows under Different Information Regimes." Journal of Agricultural Economics (2021).	milk value (WTP) from GE cows under various treatment/regimes	milk	WTP for milk of ge hornless cows. (animal welfare)	x		x	milk from ge dehorned cows, not dehorned cows, traditionally dehorned	1000 surveys to estimate wtp under different information regimes 9animal welfare) using parametric and semi parametric hypothetical discrete choice models.control and 4 treatments of information (none, to GE better than GMO and animal welfare)	1043	information is polarising (hollowing the middle). The discount for Genome editing falls as more info is provided from -2.67 to -1.38 an discount for traditiona dehorning increases from -1.17 to -3.22. Standard deviations become larger and more significant as more info is provided. 34% with positive wtp for gene-gmo-aw. nonparaemtric show bimodal distributions in wtp for the milk	na	x	na	x	na	USA	not much on the sampling	also conisders cows with horns (3 options, ge dehorned, conventional dehorned, not dehorned)	x
28	2014	Kronberger, Wagner, and Nagata (2014)	Kronberger, Nicole, Wolfgang Wagner, and Motohiko Nagata. (2014). "How natural is “more natural”? The role of method, type of transfer, and familiarity for public perceptions of cisgenic and transgenic modification." Science Communication 36, no. 1 (2014): 106-130.	perceptions of cisgenic v transgenic and desire to see a lable or not on cisgenic	animals, human, plants, apples	perception for 3 types of hybrids, gene transfer (sex or ge), mention of hybrid existence, study 3 on apple cisgenic/transgenic ieurobarometer question		x	x	naturalaness of ge hybrids, negative imaginary, moral acceptability, usefulness, risk, familiarity, disease resistane apple trees and redued pesticides use	simple surveys of students and then ANOVA just frequencies from eurobarometer data, mostly simple correlations and means and frequencies.	study 1 188 students; study 2 83 non students asutrian, 123 japanese non students, efsa barometer data 13,529	unfamiliar hybrid is seen more negatively; concern for ge driven hybrid, cross-breeding even less acceptable than cisgenic/sexual breeding; eurobarometer cicgenic apples are more acceptables than transgenic but still consumere would like a GMO label for both transgenic and cisgenic. In all EU countries, our example of the cisgenic production of apples receives higher support (55%) than transgenic…	x		cisgenic	x		Austria, Japan, EU 27	students and non students in Austria and Japan, EU 27 countries	a bit soft on perception and psychology. And extreme case of cross breeding human-animal	x
29	2006	Lusk and Rozan (2006)	Lusk, J. L., & Rozan, A. (2006). Consumer acceptance of ingenic foods. Biotechnology Journal: Healthcare Nutrition Technology, 1(12), 1433-1434.	Consumer acceptance of ingenic foods.	vegetables	wt eat vegetable		x	x	extrae gene(s) ingenic or transgenic	survey and yes no and frequencies and chis quare test	501 in USA, 200 in France	77.3% of US respondents would eat a vegetable with extra gene ingenic, 37.5% in France, extra gene from a different vegetable, 61.7% in US, 21 in France, extra gene from a bacterium, 25.3% in US, 7% in France!	x	na	ingenic			France USA	mail surveys random samplingfrom sampling companies	second paper on wt eat and accpetability of cisgenic (path breaking paper)	x
30	2018	Lusk, McFadden, and Wilson (2018)	Lusk, Jayson L., Brandon R. McFadden, and Norbert Wilson. "Do consumers care how a genetically engineered food was created or who created it?." Food Policy 78 (2018): 81-90.	heterogeneity in consumer preferences for genetic engineer food	food	consumer preferences wtp, acceptance	x	x	x	what food, technologies , how to regulate, or the type of innovators	food demand surveys in the US, montly surveys, frequencies on questions agree/disagree type		consumers make a diff between GMO and cisgenic, for regulation, but also that all techniques should be regulated on ehalth and environment outcome not on technology. If innovator is non profit or small better acceptance than monsanto. Consumers know that they do not know enough about these technologies. consumers do not discriminate well on regulation and risk levels. support same regulation for …	x	x	cisgenic	x	na	USA	representative sample us consumers monthly	has useful references on the parallele between GMO or gen enginereed food more acceptable with health or environment benefits see section 3	x
31	2021	Marette, Beghin, Disdier, and Mojduszka (2021)	Marette, Stephan, John Beghin, Anne-Célia Disdier, and Eliza Mojduszka.2021 "Can foods produced with new plant engineering techniques succeed in the marketplace? A case study of apples." (2021): 36-p.	WTP for GE apple and demand for apple	apples	emergence on market and demand	x		x	reduced bruising/browning	surveys (see Marette et al. 2021)		use the WTP >0 to derive a consumer demand (	x	x	na	x	na	France, USA		this is the same WTP study as Marette Disdier Beghin but it is utiized to consruct a consumer demand using the non protext and positive segments of the WTP distribution	x
32	2021	Marette, Disdier, and Beghin (2021)	Marette, S.; Disdier, A.-C.; Beghin, J.C. A comparison of EU and US consumers’ willingness to pay for gene-edited food: evi-357 dence from apples. Appetite 2021, 159, https://doi.org/10.1016/j.appet.2020.105064.	WTP of conventional hybrid, GE, GMO improved apples	apples	WTP for novel apples	x		x	reduced bruising and browning, reduced food waste	hypothetical choice experiments tobit estimation	166 US, 162 France	In the USA: GE discounted (0.9718 unitless), conventional (0.9564), hybrid (1.2490), GMO (0.8582), attitude wrt innovation can reverse the discounts in france:GE discounted (0.4615 unitless), conventional (1.0236), hybrid (0.9836), GMO (0.1547), attitude wrt innovation can reverse the discounts	x	x	na	x	na	France, USA	college staff and faculty in US, representative sample in France	science/technology attitude influences wtp, protest /boycott consumers	x
33	2021	McFadden et al. (2021)	McFadden, Brandon R., Brittany N. Anderton, Kelly A. Davidson, and John C. Bernard. "The effect of scientific information and narrative on preferences for possible gene‐edited solutions for citrus greening." Applied Economic Perspectives and Policy (2021). DOI: 10.1002/aepp.13154	WTP for three oranges produced with GE insect or GE tree to prevent citrus greening	oranges	WTP for oranges: either when insects are gene-edited or trees are gene-edited	x			prevention of citrus greening	hypothetical choice experiment using random utility model; specific estimation approach not disclosed	1185 (Qualtrics via internet)	No significant difference between insect GE/tree GE in simple model. Interactions between "narrative" information exposure decreased WTP for insect GE (-$0.19/3 oranges), but information relating GE to conventional breeding counteracted the impact; In specification 2, Insect = -0.113(0.050), p<0.01. Insect*I1: 0.243(0.108), p<0.05	na	x	na	na	na	USA	representative US sample by age, income, and sex	Paper is generally about effect of information about similarity of GE, GM, and conventional breeding on perceptions of similarity and perceived safety of techniques	x
34	2013	Mielby, Sandøe, and Lasse (2013)	Mielby, H., Sandøe, P., Lassen, J., 2013. Multiple aspects of unnaturalness: are cisgenic crops perceived as being more natural and more acceptable than transgenic crops? Agric. Hum. Values 30, 471–480.	perception of cisgensis crops for less unnaturalness	crops			x	x		5 focus groups of 6 to 8 people interviews with 3 assignments (key words associtade with GM, ranking cards showing GMO plants by decreasing order of like/dislike,	small 5X 6 or 8	it is diffifcult to define naturalness and human interference trans and cisgenic seems to bother people , foreign versus own genes, and features (danger to introduce a new feature)	x	na	cisgenic	na	na	Denmark	not at all representative, same education level	could maybe use this article to explain that humans have a complex heterogenous perception of unnaturalness using several criteria and that the foreign/own gene dichotomy is only one possible among 5	x
35	2020	Muringai, Fan, & Goddard. (2020)	Muringai, Violet, Xiaoli Fan, and Ellen Goddard. "Canadian consumer acceptance of gene‐edited versus genetically modified potatoes: A choice experiment approach." Canadian Journal of Agricultural Economics/Revue canadienne d'agroeconomie 68, no. 1 (2020): 47-63.	WTP for GM vs. gene-edited potatoes	potato	WTP for GM vs. GE	x	x	x	Health (reduction in acrylamide levels); environmental (reduction in food waste (bruising/browning), less pesticide application).	SAS used to generate fractional factorial design: 48 choice sets blocked into six versions. stated (i.e., hypothetical) choice experiment; random parameters logit and condition logit models	3014 (online survey). "Generally representative" of natl. pop. in terms of HH size, gender, location.	Separate traits from breeding technology. WTP in CAD/KG; base breeding TK is conventional breeding. Acrylamide reduction: 1.07 (0.08); Waste reduction: 0.27 (0.07); pesticide reduction: 1.07 (0.08); GM transgenic: -2.31 (0.09); GM cis/intragenic: -2.18 (0.09); Gene editing: -1.97 (0.08); all reported values are significant at p<0.01	x	x	na	x	na	Canada	"generally representative" of Canadian population by gender, HH size, geographic location; respondents were more educated (more had university/graduate degrees), higher income, were older, and more households had children than national averages.	Results reported in this sheet are mean WTP calculated for each individual respondent. Authors also interact individual characteristics with attributes to examine heterogeneity in preferences by characteristics. See paper for these results.	x
36	2019	Narh et al. (2019)	Narh, A., L.L. Nalley, B. Dixon, H. Snell, & R.M. Nayga Jr. A multi-country study of the willingness-to-consume alternative (RNAi and CRISPR) genetically modified food. Poster at 2019 AAEA meetings	Willingness to consume rice using multiple price format for GM, CRISPR, & RNAi	rice	Willingness to consume GM, CRISPR/RNAi		x	x	Glyphosate resistance (GM/CRISPR), topical application of RNAi Bt	Multiple price format willingness to consume	CRISPR (2315); RNAi (1677)	% Willing to consume; marginal effects of responses to New Ecological Paradigm (NEP) survey	x	x	RNAi	na		Australia, Belgium, Canada, France, USA	No information	Willingness to consume; examines GM, CRISPR, & RNAi. Only a poster, so very little detail on research design elements	x
37	2021	Nlend Nkott and Temple (2021)	Nlend Nkott, Anny Lucrèce, and Ludovic Temple. "Societal acceptability conditions of genome editing for upland rice in Madagascar." Technological Forecasting and Social Change 167 (2021): 120720.	Acceptability of CRISPR-CaS9 to produce rainfed rice for use in Madagascar	rice	Conditions that would make use of CRISPR to modify rice acceptable.		x		Improved nitrogen use efficiency	38 semi-structured interviews with seed system organizations; multistakeholder forum; rice producer survey (n = 148).	38 interviews; 148 producer surveys	INTERVIEWS: concerns about 1) producers' economic/physical access to seeds (61%), 2) biosafety regulation (39%); 2) strengthening innovation dissemination system (39%). SURVEYS: low membership in producer organizations (2% of respondents), which are an important way to access information. No access to credit (76%) is another problem, given that seeds are costly (most producers save/exchange seeds…	na	x	na	na	na	Madagascar	Various stakeholders in the rice industry; rice producers		x
38	2020	Norwegian Biotechnology Advisory Board (NBAB). 2020	Norwegian Biotechnology Advisory Board (NBAB). 2020. Norwegian consumers’ attitudes toward gene editing in Norwegian agriculture and aquaculture.	Norwegian consumers attitudes toward ge in plants, livestock and fish with 10 different traits	fruits, vegetables, wheat, crops, beef, pork, salmon, potato	attitudes and WTP for GE goods	x	x	x	reduced pesticide, crop loss, climate adaptation, higher yield , improving animal and fish health , reduced envir impact of aquaculture	focus groups and qualitative and quantitative surveys and ANOVA	20 in focus groups, 2,000 online panel	attitudes in favor for animal welfare, health, environment improvements, against appearance changing for ag, aimals or increasing production traits in animal or affect their welfare negatively. most consumers have risk concerns on negative effects on health and environment. trust for local research (home bias), distrust for "global" market and producers. Trust in norwegian governance-approval pro…	x	x	na	na	x	Norway	2016 respondents, nationally representative of age, gender and geographical region from online IPSOS panel but education higher than country average	big lag between surveys and publications (4 years), so it could influence results by limited familarity with ge in 2016. no WTP estiate just a question: willing to pay extra for improved ge	x
39	2021	Pruitt, Melton, & Palma (2021)	Pruitt, J.R., K.M. Melton, & M.A. Palma. 2021. Does Physical Activity Influence Consumer Acceptance of Gene-edited Food? Sustainability. 13(x)	Willingness to pay for GE vs GMO potatoes	potato	WTP for GM vs. GE	x		x	Health (reduced acrylamide levels); Cosmetic (reduced bruising)	"Choice experiment" for a potato and gift certificate of varying value	282	$0.529 (se=0.153, p<0.01; no demographics); $0.472 (se=0.243), p<0.1; w/ demographics)	x	x	na	na	na	USA	College students, grad students, faculty staff (though mean age = 22 years, so likely really only students)
40	2017	Rousselière and Rousselière (2017)	Rousselière, D., & Rousselière, S. (2017). Is biotechnology (more) acceptable when it enables a reduction in phytosanitary treatments? A European comparison of the acceptability of transgenesis and cisgenesis. PloS one, 12(9), e0183213.	Estimation of a Bayesian multilevel structural equation model on acceptability using data from the Eurobarometer 2010 73.1 on science.	apples	Attitudes and heterogeneity of attitudes at individual and national levels in EU/EU-adjacent countries using data from Eurobarometer 2010		x	x	Resistance to apple scab and mildew	Bayesian multilevel structural equation model	15,650 (reported in table 1 as "Sample"--somewhat unclear because in the same table they list Luxemburg, Netherlands, Turkey, and Hugary separately)	Acceptability of cis- vs. trans-genic TK; environmental attitudes; interest in science/biotk, relationship between individual and national heterogeneity of attitudes; Cis (44.0%) vs. Trans (27.5%) said "should be encouraged." Some difference in questions for cis- vs. trans-genic TK; 42.4% thought Transgenic is "promising"; 60.5% though Cisgenic "will be useful." See notes for additional findings …	x		cisgenic	na	na	EU-27, Norway, Iceland, Turkey	EU-27 countries plus Norway, Iceland, Turkey	See notes. Language in scenarios posed to participants = "a series of questions was asked with an initial scenario given that each individual was supposed to answer: Some European researchers think there are new ways of controlling common diseases in apples—things like scab and mildew. There are two new ways of doing this. Both mean that the apples could be grown with limited use of pesticides, a…	x
41	2004	Schaart (2004)	Schaart, J.G. (2004). Towards consumer-friendly cisgenic strawberries which are less susceptible to Botrytis cinerea. Ph.D. Thesis. Wageningen University	PhD Thesis with a section reporting the results of a survey of residents of Norway, Denmark, and UK about GM strawberries	strawberries	Attitudes towards GM; willingness to buy GM strawberries with different traits; acceptability of trans- vs. cis-genic modification.	x	x	x	Traits examined (note: no comparison between trans and cisgenic TK): longer-lasting, bigger & redder, 20% cheaper, better tasting, lower pesticide use, organic principles, healthier	Summary statistics of survey responses	720	Attitudes towards GM: "will lead to improvements" = ~30%; "make things worse" = ~40%. Traits (would buy) = longer-lasting (~37%), bigger & redder (~39%), 20% cheaper (~50%), better tasting (~52%), lower pesticide use (~58%), organic principles (~62%), healthier (~66%). Cisgenic more acceptable than trans: Completely agree = ~40%; partly agree = ~37%.	x	na	cisgenic	na	na	Norway, Denmark, UK	"Consumers" in Norway, Denmarket, UK	Most of the thesis is about the technological development of the cisgenic strawberry. In chapter 7, <3 pages are devoted to discussing the consumer survey.	x
42	2011	Schenk et al. (2011)	Schenk, Martijn F., Marinus P. van der Maas, Marinus JM Smulders, Luud JWJ Gilissen, Arnout RH Fischer, Ivo A. van der Lans, Evert Jacobsen, and Lynn J. Frewer. "Consumer attitudes towards hypoallergenic apples that alleviate mild apple allergy." Food Quality and Preference 22, no. 1 (2011): 83-91.	Perception of the benefits of a novel hypoallergenic apple, comparing traditional breeding with transgenic and cisgenic GM	apples	Choice experiment (without price); attitudes towards GM/conventional apples		x	x	Reduced allergenicity	Repeated measures mixed linear models	397	Traditional breeding>cisgenic>transgenic (>=preferred); consumers preferred apples that required less pesticides and that were less allergenic to people with apple allergies. Preference for attributes varied with individual characteristics (e.g., people with apple allergy strongly differentiated between apples with different levels of hypoallergenicity, whereas people not allergic did not). Resul…	x	na	cisgenic	x	na	Netherlands	Shoppers in a supermarket		x
43	2016	Shew et al. (2016)	Shew, Aaron M., Lawton L. Nalley, Diana M. Danforth, Bruce L. Dixon, Rodolfo M. Nayga Jr, Anne-Cecile Delwaide, and Barbara Valent. 2016. “Are All GMOs the Same? Consumer Acceptance of Cisgenic Rice in India.” Plant Biotechnology Journal 14 (1): 4–7.	Acceptance and WTP for cisgenic vs. transgenic (vs. conventional) rice	rice	WTP for cis/transgenic rice (vs. convention) with/without infromation about elimination of fungicides.	x	x	x	Cisgenic vs. GM vs. no fungicide (presented in sequentially in a three-round process)…puzzling	Multiple price list hypothetical WTP elicitation; Interval regression (WTP) and bivariate probit (WTC)	300 consumers in Jaipur	Participants' WTP was significantly higher (than 0) for the "no fungicide" attribute and did not decrease (statistically) when the GM or cisgenic attribute was also present. WTP was less for GM/cisgenic varieties when there was no benefit provided. All reported values are significant at p<0.05	x	na	cisgenic	x	na	India	Convenience samples recruited from different locations in Jaipur.	Authors did not present cisgenic and transgenic GM as differing only in whether introduced genes originated within the same species or not; they described cisgenic as "bred using a process in which genes are transferred between crossable organisms (same species or closely related species). The same result could be obtained by cross-breeding that occurs in nature or by traditional breeding methods…
44	2017	Shew et al. (2017)	Shew, Aaron M., Diana M. Danforth, Lawton L. Nalley, Rodolfo M. Nayga, Francis Tsiboe, and Bruce L. Dixon. 2017. “New Innovations in Agricultural Biotech: Consumer Acceptance of Topical RNAi in Rice Production.” Food Control 81 (November): 189–95.	Willingness to consume and willingness to pay for RNAi vs. GM rice in USA, Canada, Belgium, France, and Australia	rice	Willingness to consume and WTP for RNAi vs. GM rice (vs. conventional)	x	x	x	Bt in GM rice; RNAi for insect control.	Multiple price list hypothetical WTP elicitation; Interval regression (WTP) and bivariate probit (WTC)	2077; in US (439), Canada (399), Australia (400), France (439), & Belgium (400)	WTP for Bt lower then conventional by $12.56 (US), $8.97 (Canada), $7.95 (Australia), $13.35 (France), and $8.66 (Belgium); WTP for RNAi lower then conventional by $7.62, $4.38, $4.24, and $4.92 for US, Canada, Australia, and France. Belgium not significantly lower. Older respondents required less of a discount than younger respondents. All reported values in column I are significant at p<0.05.	x	na	RNAi	x	na	Australia, Belgium, Canada, France, USA	Recruited by SSI; indicated targeting gender, age, education, and income to be representative of study countries	Not sure which category RNAi should be in, re: GE vs. NPETs/NBTs	x
45	2018	Shew et al. (2018)	Shew, Aaron M., L. Lanier Nalley, Heather A. Snell, Rodolfo M. Nayga, and Bruce L. Dixon. 2018. “CRISPR versus GMOs: Public Acceptance and Valuation.” Global Food Security 19 (December): 71–80.	Willingness to consume and willingness to pay for CRISPR vs. GM rice in USA, Canada, Belgium, France, and Australia	rice	Willingness to consume and WTP for CRISPR vs. GM rice (vs. conventional)	x	x	x	Glyphosate resistance	Multiple price list hypothetical WTP elicitation; Interval regression (WTP) and bivariate probit (WTC)	2315 in US (451), Canada (463), Belgium (458), France (499), & Australia (444)	WTC CRISPR (WTCCR)>WTC GM by ~2-17 % pts. (Tbl1); WTCCR range = [40.3, 71.4]; belief that CRISPR & GM helps, is safe & familiarity with GM increases WTCCR; consumers required a discount of $4.58, $1.17, $1.59,$2.12, and $2.24 per pound for CRISPR rice compared to conventionally bred rice in the USA, Canada, Belgium, France, and Australia, respectively, compared to a discount of $4.80, $0.92, $1.6…	x	x	na	x	na	Australia, Belgium, Canada, France, USA	Recruited by SSI; no details provided about targeted participant characteristics.	Conducted a short vs. long information treatment (p. 73 of paper);	x
46	2021	Son and Lim (2021)	Son, Eunae, and Song Soo Lim. 2021. “Consumer Acceptance of Gene-Edited versus Genetically Modified Foods in Korea.” International Journal of Environmental Research and Public Health 18 (7). https://doi.org/10.3390/ijerph18073805.	WTP for GM vs. gene-edited soybean oil	soybean oil, cotton	WTP for GM vs. GE vs. conventional	x		x	None specified (beyond GM vs. GE vs. conventional).	Choice experiment (hypothetical); estimation by multinomial logit by MLE	Stratified (by gender, age) sample of 200 consumers in South Korea	MWTP for GM and GE significantly less than conventional (presented in Korean Won) products for both soybean oil and cotton t-shirts. GM<GE for soybean oil, but reversed for t-shirts (though differences between GM/GE were not tested statistically). All MWTP values are signifcant at p<0.001	x	x	na	na	na	South Korea	Stratified sample based on age and gender	No specific trait targeted by GM/GE was mentioned in the document, so respondents likely didn't have a sense of why GM/GE technology was important. The authors also examine MWTP range (max minus min) based on a few individual characteristics, but the results are not particularly informative.
47	2017	Tsiboe et al. (2017)	Tsiboe, Francis, Lawton L. Nalley, Bruce L. Dixon, Diana Danforth, Anne-Cécile Delwaide, and Rodolfo M. Nayga. "Ghanaian Consumers’ Attitudes toward Cisgenic Rice: Are all Genetically Modified Rice the Same?." Ghana Journal of Development Studies 14, no. 1 (2017): 1-18.	WTP for GM, cisgenic, or environmentally beneficial rice	rice	WTP trans vs. cisgenic vs. conventional vs. environmentally beneficial	x		x	rice blast fungus resistance	Multiple price format willingness to pay for 5kg of rice	253 university students	WTP premium for EB=$13.75 (vs. conventional); WTP discount of $9.75 and $19.94 for cis/transgenic (vs. conventional); respondents w/ more education were WTP more for GM (vs. HS* The text says that more education=higher WTP for GM, but the estimates in the table seem to suggest that it's actually opposite--more education = higher WTP for conventional...perhaps do not discuss this finding given lac…	x	na	cisgenic	x	na	Ghana	University students	Not entirely clear what information participants received about use of GM technology--I don't see that they were provided with text indicating that GM was used to provide rice blast fungus resistance. Some additional findings on attitudes towards cisgenic, transgenic, and GM; findings show that GM is viewed more negatively than cis or transgenic. Again, not clear how cisgenic and transgenic are d…
48	2021	Uddin, Gallardo, Rickard, Alston, and Sambucci (2021)	Uddin, Azhar, Karina Gallardo, Bradley J. Rickard, Julian M. Alston, and Olena Sambucci. "Are Consumers Willing to Accept Gene Edited Fruit? An Application to Quality Traits for Fresh Table Grapes." (2021).	WTP for attributes of table grapes generated by GE	grapes	WTP for attributes	x	x	x	sweeteness, crispness,flavor, skin color, size	online surveys and discrete choice experiment in between subject experiment then mixed logit estimation of rum and latent class model for heterogenous consumers and the source of their preferences treatment on technology, prices and attributes. Qua;trics plus JMP app to do fractional factorial design to reduce the number of exps to 8	2873	wtp for attributes (-beta attributes/beta price) wtp conventional=4.1, GE=3.4 and 3.5, logit shows highst wtp for sweeteness, crisp and flavorful and green grapes better than amber/yellow blush. Marginal wtp for sweeteness and color is higher for Gethan for conventional hybrids, identified 3 groups of consumers` 3d group finds ge ethical, safe natural	na	x	na	x	na	USA	us population but higher income, more women younger whiter too, representative of population of surveys not the US		x
49	2020	Vasquez Arreaga (2020)	Vasquez Arreaga, Oswaldo. CANADIAN CONSUMER PERCEPTION OF GENOME-EDITED FOOD PRODUCTS. MS Thesis. University of Saskatchewan, 2020.	Perceptions and willingness to consume GE and GMO (transgenic) foods	potato, apples, milk, salmon, papaya, sweet corn	WTC GE and GM foods		x	x	potatoes: resistance to blackspot bruising & lower levels of asparagine; apples: reduced browning; milk: dehorned cattle	Multinomial logit; probit	497 English-speaking Canadians	Summary statistics on WTC: max of 50% of respondents WTC GE/GM product (GM sweet corn); all others < 50%. (However, only ~80% WTC an organic apple, 78% organic beef, 62% organic bread). Significance not reported	x	x	na	na	x	Canada	English-speaking Canadians	Additional research on individual characteristics reported in the paper. The variables are not named clearly, however, so I'll need to go back and look at them again. Some expected findings: neophilic consumers more WTC GE/GM; neophobic less WTC GE/GM, etc.	x
50	2020	Yang and Hobbs (2020a)	Yang, Yang, and Jill E. Hobbs. "Supporters or opponents: will cultural values shape consumer acceptance of gene editing?." Journal of Food Products Marketing 26.1 (2020): 17-37.	Cultural values and acceptance of GE	food	Factors affecting attitudes towards GE		x		NA	Survey analyzed via ordered probit	697	Effect of individual characteristics on attitudes towards GE; positive views of science/TK highly positively related to attitudes towards GE (p<0.01); people who think the risks of biotechnology outweigh benefits have significantly more negative attitudes towards GE (p<0.01); Quebec residents have significantly more negative attitudes (p<0.01); no other variables are significant at normal levels …		x	na	na	na	Canada	Somewhat representative sample of Canadian adults (both French and English speaking)	See paper for marginally significant variables (impact of hierarchical/egalitarian score, gender, presence of children)	x
51	2020	Yang and Hobbs (2020b)	Yang, Yang, and Jill E. Hobbs. "The power of stories: Narratives and information framing effects in science communication." American Journal of Agricultural Economics 102.4 (2020): 1271-1296.	Impact of "narrative" (scientific vs. "informal, personal" communication styles) on wtp for apple slices	apples	WTP for attributes	x		x	non-browning; enhanced with anti-oxidants; GE vs GM vs conventional	Hypothetical choice experiment analyzed using multinomial logit and random parameters logit	804	Table 10 in paper presents WTP estimates for attributes in no information vs. 4 information treatments. GE/GM all significantly negative WTP in no info condition; information frequently reduces discount required, but does not eliminate it (still negative WTP even in info conditions). All WTP for GE/GM in no info condition (p<0.01); in info conditions, p<0.05) except for a condition with few obser…	x	x	na	x	na	Canada	Somewhat representative sample of Canadian adults (both French and English speaking)		x
52	2019	Yunes et al. (2019)	Yunes, Maria Cristina, Dayane L. Teixeira, Marina AG von Keyserlingk, and Maria J. Hötzel. "Is gene editing an acceptable alternative to castration in pigs?." PloS one 14, no. 6 (2019): e0218176.	Acceptability of GE to castrate male pigs	pork	Factors affecting acceptability of GE		x		Avoiding boar taint	Online survey analyzed with multinomial logistic regression	570	56% of participants considered GE an acceptable method to reduce boar taint; 22% intermediate; 22% opposed. Respondents who grew up in an ag. Environment thought GE was less acceptable than those who did not. Highest reason justifying attitude towards use of GE in pigs: Acceptable: positive effects on animal welfare (63%); intermediate - potential risks GE (61%); not acceptable - dislike/oppose G…	na	x	na	na	na	Brazil	Representative of population of southern Brazil by sex, age, and place of residence; higher education and less religious than population	Also asked a set of questions about acceptability of plant/animal-based biotechnologies used in food production: highest level of acceptability was 43% (for GM vegetables with higher levels of nutrients) down to 25% for meat produced in vitro from pig stem cells). Disparity between high level of support for GE to address boar taint and low levels of support for other genetic technologies is sligh…	x
53	2019	Yunes et al. (2021)	Yunes, Maria Cristina, Zimbábwe Osório-Santos, Marina AG von Keyserlingk, and Maria José Hötzel. "Gene Editing for Improved Animal Welfare and Production Traits in Cattle: Will This Technology Be Embraced or Rejected by the Public?." Sustainability 13, no. 9 (2021): 4966.	Acceptability of GE to 1) increase muscle production; 2) increase heat tolerance; 3) eliminate the need to surgically remove horns	beef	Acceptability/factors affecting acceptability of GE for different purposes		x		Increasing meat production, animal welfare/productivity (heat tolerance, hornlessness)	Face-to-face interviews for qualitative analysis; online survey for quantitative analysis	32 in interviews; 864 online surveys	QUALITATIVE themes: benefits/risks of GE; GE and status quo in animal production; "naturalness" of GE and threat to animals' integrity; trustworthiness of information sources about GE. QUANTITATIVE: 73% totally/somewhat opposed to GE for muscle growth; 53% for heat resistance; 49% for horn removal. Dem. variables significantly more accepting = Men; Younger respondents; Educated; Income; ASF consu…	na	x	na	na	na	Brazil	Qualitative: Attendees of university extension event; Quantitative: recruited from Instagram		x
summary frequencies							29	37	40					35	30	23	31	10				43
															rnai	4
															cisgenic	15
															intragenic	3
															ingenic	1

## Sheet: table  for  the paper
Authors and date	commodity/food item	wtp	attitude acceptance	GMO	GE	NPETs other than GE	conventional/ hybrids	organic	country
An, et al. (2019)	canola oil	x		x	x	na	na	na	Canada
Arias-Salazar et al. (2019)	food, crops, rice, beans		x	na	x	na	na	na	Costa Rica
Britton and Tonsor (2019)	beef	x		na	na	RNAi	na	na	usa
Britton and Tonsor (2020)	beef		x	na	na	RNAi	na	na	usa
Borrello, et al. (2021)	wine	x	x		x	na	x		Italy
Busch et al. (2021)	wheat, humans, milk, beef, pork		x	na	x	na	na	na	Canada, Austria, USA, Germany, Italy
Caputo,et al. (2020)	pork, tomato, spinash	x	x	x	x	na	x	x	USA
Colson and Huffman (2011)	vegetables	x		x	na	intragenic	x	na	USA
Colson, et al. (2011)	tomato, broccoli, potato	x		x	na	intragenic	x	na	USA
De Marchi, et al. (2020a)	apples		x	na	x	na	x	na	Italy
De Marchi, et al. (2020b)	apples		x	na	na	cisgenic	x	na	Italy
De Marchi, et al.(2019)	apples	x		na	na	cisgenic	x	na	Italy
De Steur et al. (2016)	tomato, broccoli, potato, vegetables	x	x	x	na	intragenic	x	na	USA, China, France, NZ,
Delwaide et al. (2015)	rice	x	x	x	na	cisgenic	x		EU countries: Belgium, France, The Netherlands, Spain, The UK.
Edenbrandt (2018)	rye bread	x		x	na	cisgenic	x	x	Denmark
Edenbrandt, et al. (2018)	rye bread	x		x	na	cisgenic	x	x	Denmark
Edenbrandt, et al. (2018b)\.	grapes	x		x	na	cisgenic	x	na	USA
European Food Safety Authority (EFSA) (2010)	food, drink		x	x	na	na	x	na	EU-27
European Food Safety Authority (EFSA) (2019)	food, drink		x	x	x	na	x	na	EU-27
Farid, et al. (2020)	food, crops	x	x	na	x	na	na	na	Japan
Ferrari, et al. (2020)	food		x	x	x	na	na	na	Belgium, Netherlands
Gaskell et al. (2011)	food		x	x	na	cisgenic	x	na	EU-27
Gatica-Arias, et al. (2019)	food, crops, rice, beans		x	na	x	na	na	na	Costa Rica
Ishii and Araki (2016)	food		x	na	na	na	na	na	na
Kato-Nitta,et al. (2021)	tomato, pork		x	x	x	na	x	na	Japan
Kato-Nitta, et al. (2019)	crops		x	x	x	na	x	na	Japan
Kilders and Caputo (2021)	milk	x		na	x	na	x	na	USA
Kronberger, et al. (2014)	animals, human, plants, apples		x	x		cisgenic	x		Austria, Japan, EU 27
Lusk and Rozan (2006)	vegetables		x	x	na	ingenic			France USA
Lusk, et al. (2018)	food	x	x	x	x	cisgenic	x	na	USA
Marette,et al. (2021a)	apples	x		x	x	na	x	na	France, USA
Marette,et al. (2021b)	apples	x		x	x	na	x	na	France, USA
McFadden et al. (2021)	oranges	x		na	x	na	na	na	USA
Mielby, et al. (2013)	crops		x	x	na	cisgenic	na	na	Denmark
Muringai, et al. (2020)	potato	x	x	x	x	na	x	na	Canada
Narh et al. (2019)	rice		x	x	x	RNAi	na		Australia, Belgium, Canada, France, USA
Nkott and Temple (2021)	rice		x	na	x	na	na	na	Madagascar
Norwegian Biotechnology Advisory Board (NBAB). 2020	fruits, vegetables, wheat, crops, beef, pork, salmon, potato	x	x	x	x	na	na	x	Norway
Pruitt, et al. (2021)	potato	x		x	x	na	na	na	USA
Rousselière and Rousselière (2017)	apples		x	x		cisgenic	na	na	EU-27, Norway, Iceland, Turkey
Schaart (2004)	strawberries	x	x	x	na	cisgenic	na	na	Norway, Denmark, UK
Schenk et al. (2011)	apples		x	x	na	cisgenic	x	na	Netherlands
Shew et al. (2016)	rice	x	x	x	na	cisgenic	x	na	India
Shew et al. (2017)	rice	x	x	x	na	RNAi	x	na	Australia, Belgium, Canada, France, USA
Shew et al. (2018)	rice	x	x	x	x	na	x	na	Australia, Belgium, Canada, France, USA
Son and Lim (2021)	soybean oil, cotton	x		x	x	na	na	na	South Korea
Tsiboe et al. (2017)	rice	x		x	na	cisgenic	x	na	Ghana
Uddin, et al.i (2021)	grapes	x	x	na	x	na	x	na	USA
Vasquez Arreaga (2020)	potato, apples, milk, salmon, papaya, sweet corn		x	x	x	na	na	x	Canada
Yang and Hobbs (2020a)	food		x		x	na	na	na	Canada
Yang and Hobbs (2020b)	apples	x		x	x	na	x	na	Canada
Yunes et al. (2019)	pork		x	na	x	na	na	na	Brazil
Yunes et al. (2021)	beef		x	na	x	na	na	na	Brazil

## Sheet: statistical summary
countries coverage in studies						european countries	USA/ Canada	lac	Africa	Asia		country list				summary data on studies
Australia, Belgium, Canada, France, USA						x	x					Australia				53 studies from 2004 to 2021
Australia, Belgium, Canada, France, USA						x	x					Austria				37 acceptance/Wt Eat
Australia, Belgium, Canada, France, USA						x	x					Belgium				29 wtp but some multiple countries
Austria, Japan, EU 27						x						Brazil				39 comparative (conventional, GMO, Npets) with 31 conventional, 35 GMO, 10 organic
Belgium, Netherlands						x						Canada				30 Genome editing
Brazil								x				CostaRica				24 npets (4 RNAi, 15 cisgenic generic, 3 intragenic, 1 ingenic)
Brazil								x				Denmark
Canada						x						EU27
Canada						x						France				number of studies	period
Canada						x						Germany				3	up to 2010
Canada						x						Ghana				5	2011-2013
Canada						x						Iceland				5	2014-2016
Canada, Austria, USA, Germany, Italy						x	x					India				18	2017-2019
Costa Rica								x				Italy				22	2020-current
Costa Rica								x				Japan				53	total 2005-2021
Denmark						x						Japan
Denmark						x						Madagascar				GMO	GE	other NPETs	Conventional Hybrids	organic
Denmark						x						Netherlands				35	30	23	31	10
eu						x						Norway					rnai	4
eu						x						SouthKorea					cisgenic	15
eu						x						Spain					intragenic	3
EU countries plus Norway, Iceland, Turkey						x						Turkey					ingenic	1
EU countries: Belgium, France, The Netherlands, Spain and The UK.						x						UK
France						x
France USA						x	x
France, USA						x	x
France, USA						x	x
Ghana									x
India										x
Italy						x
Italy						x
Italy						x
Japan										x
Japan										x
Japan										x
Madagascar									x
na
Netherlands						x
Norway						x
Norway, Denmark, UK						x
South Korea										x
US (Harrisburg Pennsylvania, Des Moines, IA)							x
US (Harrisburg Pennsylvania, Des Moines, IA)							x
US, China, France, NZ, for GMO, only US for intragenic							x
US, south region							x
usa							x
usa							x
USA							x
USA							x
USA							x
USA							x
USA							x
USA							x
USA							x
						29	20	4	2	5
